# Supplementary material
Source: Frontiers journal article supplement (https://www.frontiersin.org/articles/345015)
Supplement: Image_5.PDF [file Image_5.PDF]

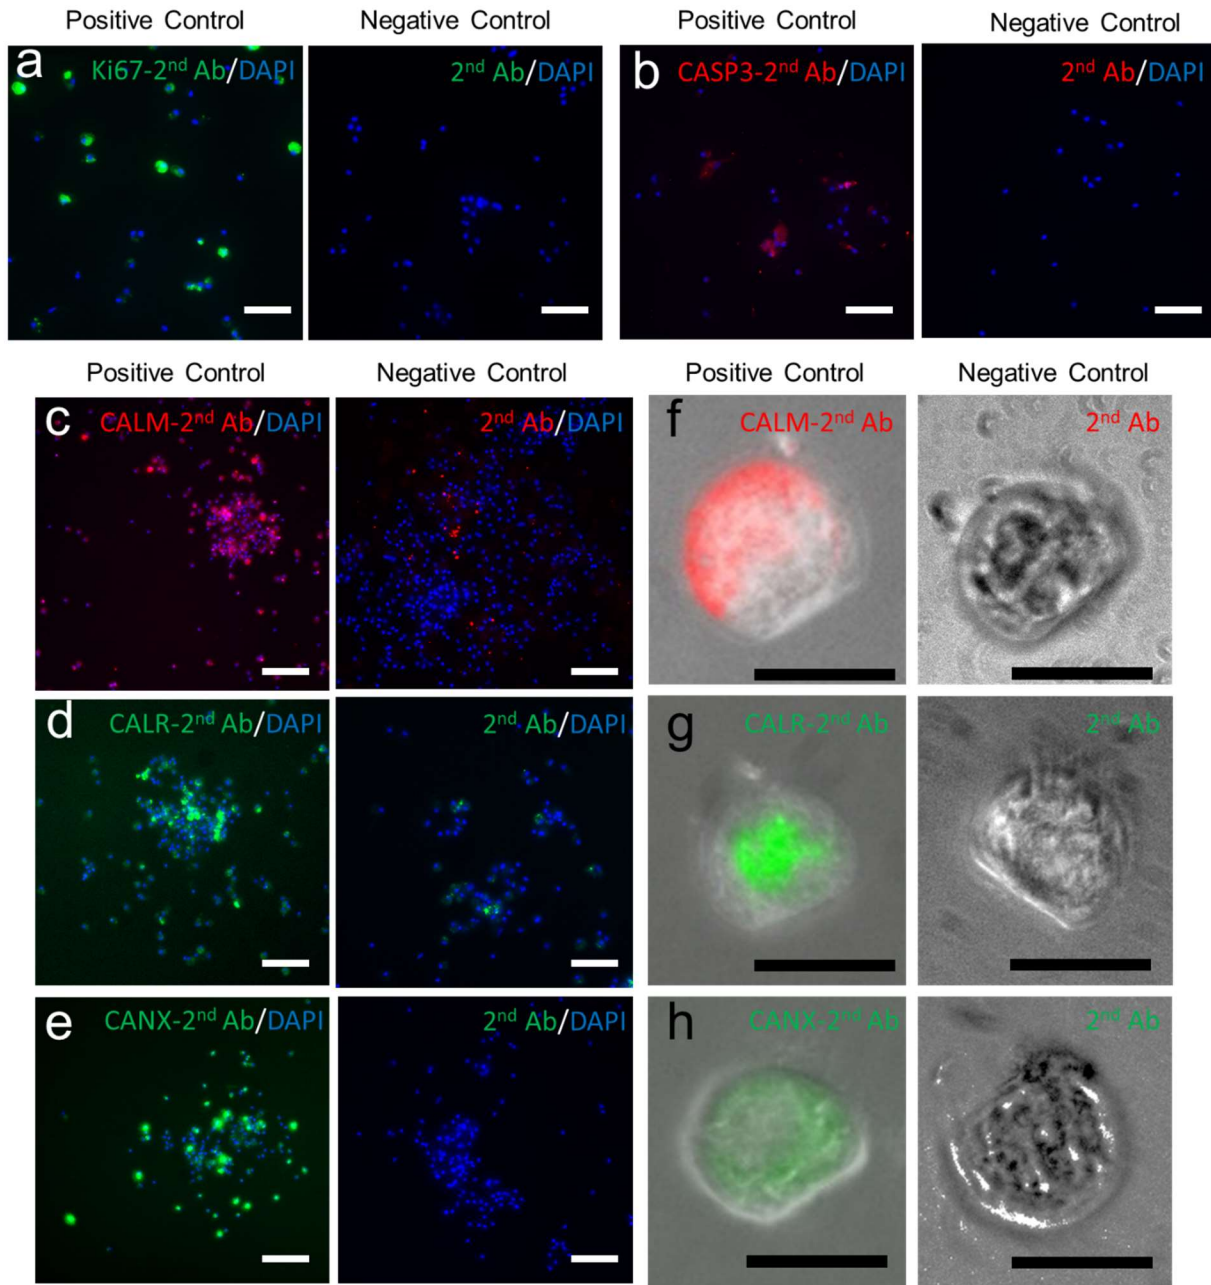

Supplementary Fig. 5. Validation of the antibodies in *C. virginica* cells and larvae. (a) IF with Ki-67 antibody on CvMCs; (b) IF with Casp3 antibody on CvMCs; (c) IF with CALM antibody on CvMCs; (d) IF with CALR antibody on CvMCs; (e) IF with CANX antibody on CvMCs; (f) IF with CALM antibody on *C. virginica* larva; (g) IF with CALR antibody on *C. virginica* larva; (h) IF with CANX antibody on *C. virginica* larva. For each antibody, IF was performed with primary antibody and fluorescence conjugated secondary antibody (2<sup>nd</sup> Ab) as positive control (left), and with secondary antibody only as negative control (right). Scale bar: 50  $\mu$ m.
